# Supplementary material
Source: HighWire-hosted journal article supplement (https://erj.ersjournals.com/content/55/3/1900851)
Supplement: inline-supplementary-material-1 [file inline-supplementary-material-1.pdf]

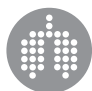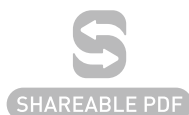

# Screening and treatment of tuberculosis among pregnant women in Stockholm, Sweden, 2016–2017

Gabrielle Fröberg<sup>1,2</sup>, Lena Jansson<sup>1</sup>, Katherine Nyberg<sup>1</sup>, Birgitta Obasi<sup>3</sup>, Katarina Westling<sup>1,4</sup>, Ingela Berggren<sup>5</sup> and Judith Bruchfeld<sup>1,2</sup>

**Affiliations:** <sup>1</sup>Dept of Infectious Diseases, Karolinska University Hospital, Stockholm, Sweden. <sup>2</sup>Division of Infectious Diseases, Dept of Medicine Solna, Karolinska Institutet, Stockholm, Sweden. <sup>3</sup>Unit of Maternal Health Care, Dept of Women's Health, Södersjukhuset, Stockholm, Sweden. <sup>4</sup>Division of Infectious Diseases and Dermatology, Dept of Medicine Huddinge, Karolinska Institutet, Stockholm, Sweden. <sup>5</sup>Dept of Communicable Diseases Control and Prevention, Stockholm County Council, Stockholm, Sweden.

**Correspondence:** Gabrielle Fröberg, B3:00, Dept of Infectious Diseases, Karolinska University Hospital, 171 76 Stockholm, Sweden. E-mail: [gabrielle.froberg@sll.se](mailto:gabrielle.froberg@sll.se)

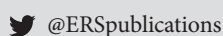

@ERSpublications

**Systematic TB screening of pregnant women in Stockholm was feasible with high yield of unknown latent TB and mostly asymptomatic active TB. Optimised routines improved referrals to specialist care. Adherence to treatment of latent TB was very high.** <http://bit.ly/2NrhEwk>

**Cite this article as:** Fröberg G, Jansson L, Nyberg K, *et al.* Screening and treatment of tuberculosis among pregnant women in Stockholm, Sweden, 2016–2017. *Eur Respir J* 2020; 55: 1900851 [<https://doi.org/10.1183/13993003.00851-2019>].

This single-page version can be shared freely online.

**ABSTRACT** Swedish National tuberculosis (TB) guidelines recommend screening of active and latent TB (LTBI) among pregnant women (PW) from high-endemic countries or with previous exposure to possibly improve early detection and treatment.

We evaluated cascade of care of a newly introduced TB screening programme of pregnant women in Stockholm county in 2016–2017. The algorithm included clinical data and Quantiferon (QFT) at the Maternal Health Care clinics and referral for specialist care upon positive test or TB symptoms.

About 29 000 HIV-negative pregnant women were registered yearly, of whom 11% originated from high-endemic countries. In 2016, 72% of these were screened with QFT, of which 22% were QFT positive and 85% were referred for specialist care. In 2017, corresponding figures were 64%, 19% and 96%, respectively. The LTBI treatment rate among all QFT-positive pregnant women increased from 24% to 37% over time. Treatment completion with mainly rifampicin post-partum was 94%. Of the 69 registered HIV-positive pregnant women, 78% originated from high-endemic countries. Of these, 72% were screened with QFT and 15% were positive, but none was treated for LTBI. 9 HIV-negative active pulmonary TB cases were detected (incidence: 215/100 000). None had been screened for TB prior to pregnancy and only one had sought care due to symptoms.

Systematic TB screening of pregnant women in Stockholm was feasible with a high yield of unknown LTBI and mostly asymptomatic active TB. Optimised routines improved referrals to specialist care. Treatment completion of LTBI was very high. Our findings justify TB screening of this risk group for early detection and treatment.
